# Supplementary material for: Sustainable In Silico-Supported Ultrasonic-Assisted Extraction of Oligomeric Stilbenoids from Grapevine Roots Using Natural Deep Eutectic Solvents (NADES) and Stability Study of Potential Ready-to-Use Extracts
Source: MDPI journal article supplement (doi:10.3390/foods13020324), 2024-01-19
Supplement: s1 [file s1]

## **Supplementary Material**

### **Sustainable In Silico-Supported Ultrasonic-Assisted Extraction of Oligomeric Stilbenoids from Grapevine Roots Using Natural Deep Eutectic Solvents (NADES) and Stability Study of Potential Ready-to-Use Extracts**

**Mats Kiene <sup>1</sup>, Malte Zaremba <sup>1</sup>, Edwin Januschewski <sup>1,2</sup>, Andreas Juadjur <sup>2</sup>, Gerold Jerz <sup>1</sup> and Peter Winterhalter <sup>1,\*</sup>**

<sup>1</sup> Institute of Food Chemistry, Technische Universität Braunschweig, Schleinitzstraße 20, 38106 Braunschweig, Germany; m.kiene@tu-braunschweig.de (M.K.); g.jerz@tu-braunschweig.de (G.J.)

<sup>2</sup> German Institute of Food Technologies, Chemical Analytics, Prof.-von-Klitzing-Straße 7, 49610 Quakenbrück, Germany; a.juadjur@dil-ev.de

\* Correspondence: p.winterhalter@tu-braunschweig.de

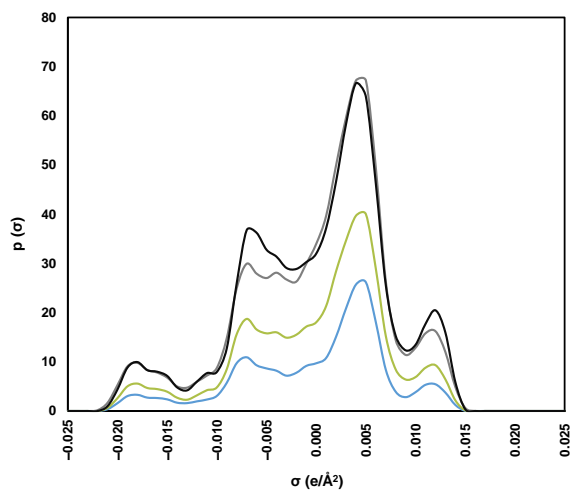

**Figure S1.** Various sigma profiles obtained by COSMOthermX of resveratrol (blue),  $\epsilon$ -viniferin (green), r-2-viniferin (gray), and r-viniferin (black).

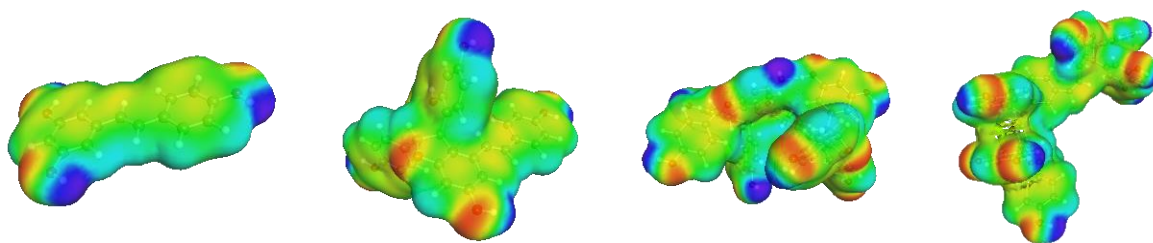

**Figure S2.** COSMO charge density surfaces of resveratrol,  $\epsilon$ -viniferin, r-2-viniferin, and r-viniferin.

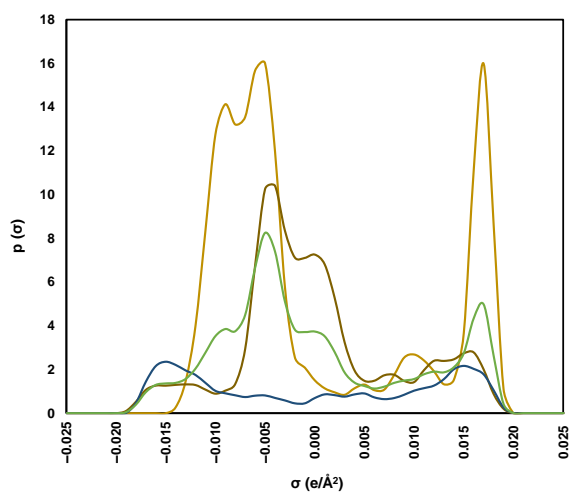

**Figure S3.** Sigma profiles obtained by COSMOthermX of choline chloride (orange), 1,2-propanediol (light brown), water (blue), and NADES system choline chloride/ 1,2-propanediol 1/2, 10 wt% H<sub>2</sub>O (green).

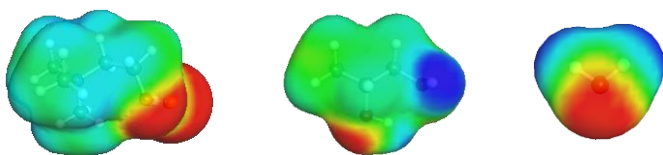

**Figure S4.** COSMO charge density surfaces of choline chloride, 1,2-propanediol, and water.

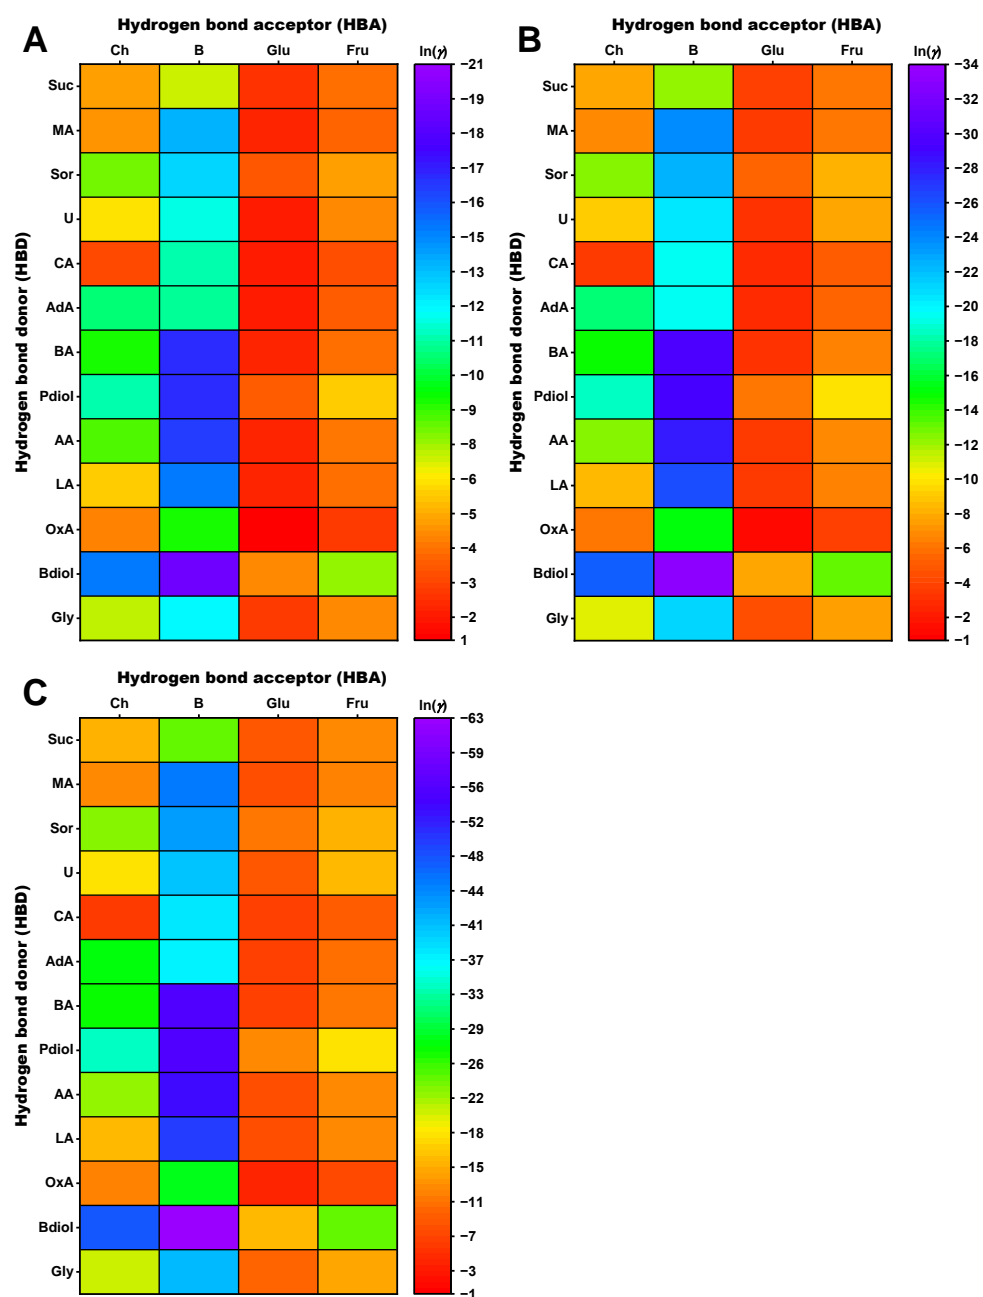

**Figure S5.** Heat map of the activity coefficients  $\ln \gamma$  calculated with COSMO-RS (25 °C) of (A) resveratrol, (B)  $\epsilon$ -viniferin, and (C) r-2-viniferin in different NADES. The molar ratio is 1/1 and the water content for all NADES is 0 wt%. Abbreviations: AA, acetic acid; AdA, adipic acid; BA, benzoic acid; B, betaine; Bdiol, 1,4-butanediol; Ch, choline chloride; CA, citric acid; Fru, fructose; Glu, glucose; Gly, glycerol; LA, lactic acid; MA, malic acid; OxA, oxalic acid; Pdiol, 1,2-propanediol; Sor, sorbitol; Suc, sucrose; U, urea.

**Table S1.** Activity coefficients  $\ln \gamma$  calculated with COSMO-RS (25 °C) of resveratrol in different NADES. The molar ratio is 1/1 and the water content for all NADES is 0 wt%. Abbreviations: AA, acetic acid; AdA, adipic acid; BA, benzoic acid; B, betaine; Bdiol, 1,4-butanediol; Ch, choline chloride; CA, citric acid; Fru, fructose; Glu, glucose; Gly, glycerol; LA, lactic acid; MA, malic acid; OxA, oxalic acid; Pdiol, 1,2-propanediol; Sor, sorbitol; Suc, sucrose; U, urea.

| HBDs  | HBAs        |             |             |             |
|-------|-------------|-------------|-------------|-------------|
|       | Ch          | B           | Glu         | Fru         |
| Scu   | −4.9020725  | −7.06341768 | −2.31637636 | −3.8239671  |
| MA    | −4.74040815 | −13.6751199 | −1.99014682 | −3.74822226 |
| Sor   | −7.92223007 | −12.9079415 | −3.21761108 | −4.85838165 |
| U     | −6.25765924 | −11.8204644 | −1.72016955 | −4.53848815 |
| CA    | −2.8528458  | −11.1845354 | −1.65862619 | −3.17076817 |
| AdA   | −10.495892  | −10.9664663 | −1.73601523 | −3.46048516 |
| BA    | −8.9996872  | −16.676928  | −1.90776139 | −3.89666887 |
| Pdiol | −11.203665  | −16.677172  | −3.38618485 | −5.77922886 |
| AA    | −8.4708809  | −16.2179418 | −1.87966044 | −4.05345277 |
| LA    | −5.78488566 | −14.9683053 | −1.91658625 | −3.89193502 |
| OxA   | −4.17392688 | −8.94038304 | −0.60857735 | −2.43936742 |
| Bdiol | −14.8703285 | −19.0348935 | −4.53943578 | −7.58030984 |
| Gly   | −7.17578482 | −12.1318439 | −2.55280565 | −4.481936   |

**Table S2.** Activity coefficients  $\ln \gamma$  calculated with COSMO-RS (25 °C) of  $\epsilon$ -viniferin in different NADES. The molar ratio is 1/1 and the water content for all NADES is 0 wt%. Abbreviations: AA, acetic acid; AdA, adipic acid; BA, benzoic acid; B, betaine; Bdiol, 1,4-butanediol; Ch, choline chloride; CA, citric acid; Fru, fructose; Glu, glucose; Gly, glycerol; LA, lactic acid; MA, malic acid; OxA, oxalic acid; Pdiol, 1,2-propanediol; Sor, sorbitol; Suc, sucrose; U, urea.

| HBDs  | HBAs        |             |             |             |
|-------|-------------|-------------|-------------|-------------|
|       | Ch          | B           | Glu         | Fru         |
| Scu   | −7.83314595 | −12.2493867 | −4.0191355  | −6.45400722 |
| MA    | −6.94318983 | −23.8255807 | −3.58595658 | −6.27132811 |
| Sor   | −12.7272501 | −22.6737539 | −5.60926765 | −8.20432838 |
| U     | −9.2806325  | −20.4518667 | −3.47663668 | −7.9298914  |
| CA    | −3.73364775 | −19.5803421 | −2.92104906 | −5.19972863 |
| AdA   | −17.1431765 | −19.5079653 | −3.08712964 | −5.75271791 |
| BA    | −14.9606313 | −29.4144698 | −3.43837313 | −6.46381106 |
| Pdiol | −18.5303389 | −29.2826391 | −6.16321327 | −10.0485621 |
| AA    | −12.7517103 | −28.300758  | −3.55575517 | −6.90590087 |
| LA    | −8.74668687 | −26.1900144 | −3.60911375 | −6.63789424 |
| OxA   | −6.42497322 | −15.1887309 | −1.42494282 | −4.08823139 |
| Bdiol | −25.4939992 | −33.3344283 | −8.07947434 | −13.216823  |
| Gly   | −11.0819306 | −21.199588  | −4.67594618 | −7.67647994 |

**Table S3.** Activity coefficients  $\ln \gamma$  calculated with COSMO-RS (25 °C) of r-2-viniferin in different NADES. The molar ratio is 1/1 and the water content for all NADES is 0 wt%. Abbreviations: AA, acetic acid; AdA, adipic acid; BA, benzoic acid; B, betaine; Bdiol, 1,4-butanediol; Ch, choline chloride; CA, citric acid; Fru, fructose; Glu, glucose; Gly, glycerol; LA, lactic acid; MA, malic acid; OxA, oxalic acid; Pdiol, 1,2-propanediol; Sor, sorbitol; Suc, sucrose; U, urea.

| HBDs  | HBAs        |             |             |             |
|-------|-------------|-------------|-------------|-------------|
|       | Ch          | B           | Glu         | Fru         |
| Scu   | −14.8276922 | −24.0795749 | −8.72722518 | −12.4456975 |
| MA    | −12.5408172 | −45.1684827 | −8.05333033 | −11.5428057 |
| Sor   | −22.6400959 | −43.0420126 | −10.8642463 | −14.6171343 |
| U     | −18.2309332 | −40.2186829 | −8.44937    | −15.2271394 |
| CA    | −6.18487969 | −37.5741287 | −6.6860048  | −9.5042266  |
| AdA   | −28.113725  | −37.1960447 | −6.62594406 | −10.1866696 |
| BA    | −26.9570446 | −55.1299865 | −6.98433542 | −10.9232217 |
| Pdiol | −34.2085756 | −55.3879061 | −12.1801361 | −18.1996727 |
| AA    | −22.2496636 | −53.4715413 | −7.84467298 | −12.3747812 |
| LA    | −15.6486184 | −49.6670453 | −8.04764402 | −12.0889504 |
| OxA   | −11.8842648 | −28.2662194 | −4.35451122 | −7.47637232 |
| Bdiol | −47.7381715 | −62.5390554 | −15.5293309 | −24.1253429 |
| Gly   | −20.354264  | −40.7184084 | −9.77601726 | −14.0592871 |

**Table S4.** Activity coefficients  $\ln \gamma$  calculated with COSMO-RS (25 °C) of r-viniferin in different NADES. The molar ratio is 1/1 and the water content for all NADES is 0 wt%. Abbreviations: AA, acetic acid; AdA, adipic acid; BA, benzoic acid; B, betaine; Bdiol, 1,4-butanediol; Ch, choline chloride; CA, citric acid; Fru, fructose; Glu, glucose; Gly, glycerol; LA, lactic acid; MA, malic acid; OxA, oxalic acid; Pdiol, 1,2-propanediol; Sor, sorbitol; Suc, sucrose; U, urea.

| HBDs  | HBAs        |             |             |             |
|-------|-------------|-------------|-------------|-------------|
|       | Ch          | B           | Glu         | Fru         |
| Scu   | −12.2142929 | −20.4874477 | −7.045484   | −10.548838  |
| MA    | −9.73520253 | −40.5058568 | −6.81516251 | −10.0933149 |
| Sor   | −19.5661532 | −38.4120091 | −9.26580226 | −12.8514011 |
| U     | −14.2745354 | −35.1398217 | −7.37453273 | −13.6762527 |
| CA    | −3.87168136 | −33.1411305 | −5.61355628 | −8.19069236 |
| AdA   | −24.9289406 | −32.4838208 | −5.5241816  | −8.78773096 |
| BA    | −23.5377778 | −50.0996249 | −6.05692509 | −9.62738704 |
| Pdiol | −30.0716511 | −50.3056629 | −10.6483683 | −16.4087197 |
| AA    | −18.2265686 | −48.3722443 | −6.86044881 | −11.0663722 |
| LA    | −12.5695809 | −44.7833741 | −7.00154431 | −10.7387853 |
| OxA   | −10.2430971 | −25.3936185 | −4.39696091 | −7.14321783 |
| Bdiol | −42.8408713 | −57.3724579 | −13.4406685 | −21.6544063 |
| Gly   | −17.1364442 | −36.0607442 | −8.65398033 | −12.7099653 |

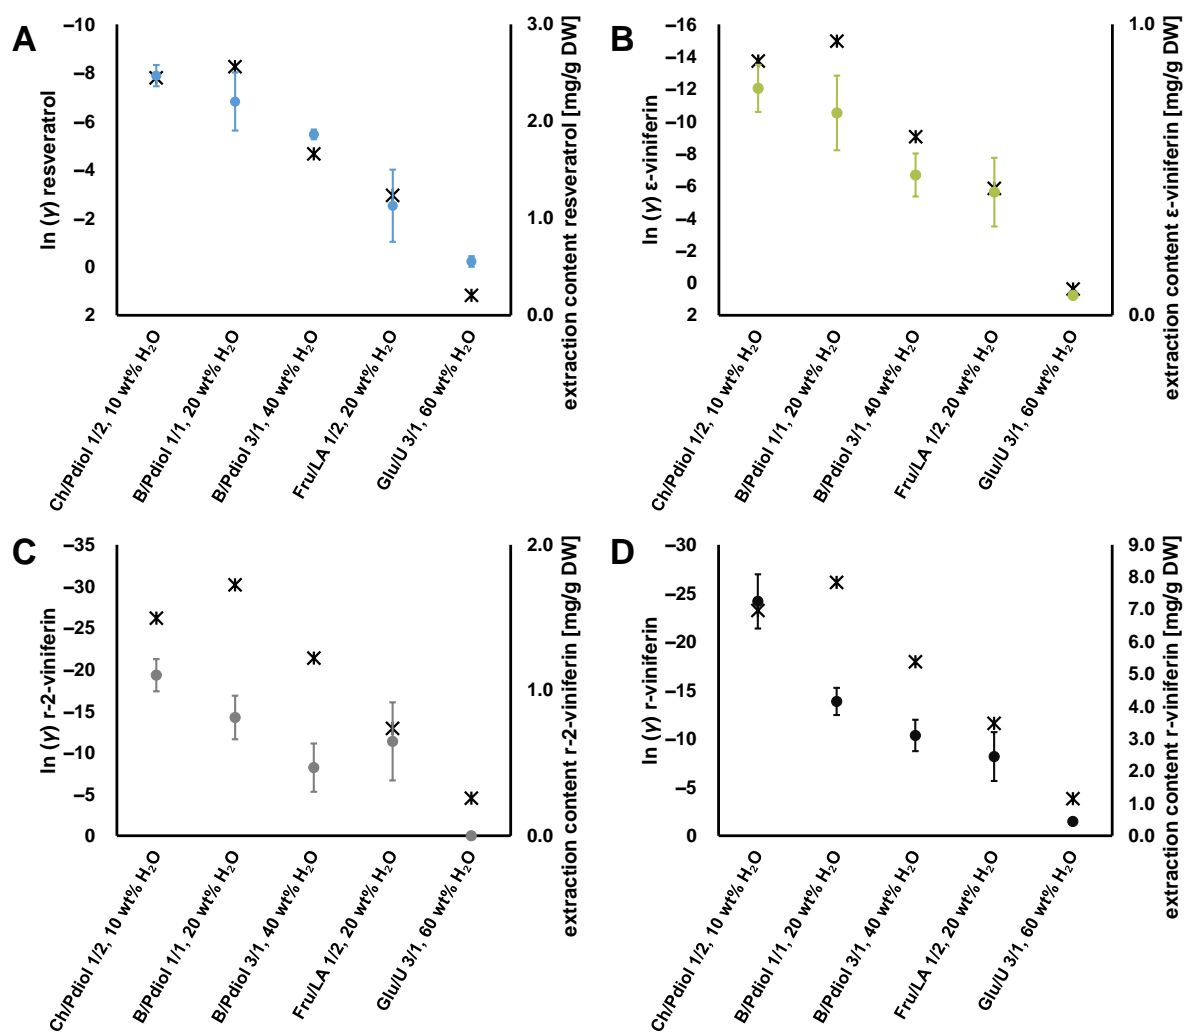

**Figure S6.** Comparison of COSMO-RS-calculated  $\ln \gamma$  values (✱) and measured extraction contents (●) of (A) resveratrol, (B) ε-viniferin, (C) r-2-viniferin, and (D) r-viniferin. Abbreviations: B, betaine; Ch, choline chloride; Fru, fructose; Glu, glucose; LA, lactic acid; Pdiol, 1,2-propanediol; U, urea.

**Table S5.** Quantification parameters of the UHPLC-UV methodology.

|                                | Resveratrol | $\epsilon$ -Viniferin | r-2-Viniferin | r-Viniferin |
|--------------------------------|-------------|-----------------------|---------------|-------------|
| Working range (mg/L)           | 2.5–20      | 2.5–20                | 0.4–43        | 12–120      |
| R <sup>2</sup>                 | 0.9996      | 0.9993                | 0.9998        | 0.9986      |
| $t_R$ (min)                    | 3.92        | 4.68                  | 4.96          | 5.47        |
| Limit of detection (mg/L)      | 0.43        | 0.61                  | 0.14          | 0.43        |
| Limit of quantification (mg/L) | 1.50        | 2.10                  | 0.55          | 1.53        |

**Table S6.** HPLC-ESI-MS/MS (negative operation mode) data of compounds identified in grapevine root NADES extract (Ch/Pdiol 1/2, 10 wt% H<sub>2</sub>O).

| Compound                             | $t_R$<br>[min] | Pseudo molecular ion<br>[M-H] <sup>-</sup> $m/z$ | Fragment ions $m/z$                    |
|--------------------------------------|----------------|--------------------------------------------------|----------------------------------------|
| Ampelopsin A                         | 9.4            | 469                                              | 451, 375, 363                          |
| <i>trans</i> -Resveratrol            | 17.1           | 227                                              | 209, 185, 159, 143                     |
| Hopeaphenol                          | 22.4           | 905                                              | 811, 717, 611, 451, 359                |
| tetrameric Stilbenoid                | 24.2           | 905                                              | 811, 717, 707, 611, 451, 357           |
| <i>trans</i> - $\epsilon$ -Viniferin | 27.2           | 453                                              | 435, 411, 385, 359, 347, 289, 253, 225 |
| Miyabenol C                          | 30.0           | 679                                              | 661, 673, 585, 573, 479, 451, 345      |
| r-2-Viniferin                        | 31.0           | 905                                              | 887, 811, 705, 675, 545, 451, 359      |
| trimeric Stilbenoid                  | 34.7           | 679                                              | 673, 585, 447, 491, 357                |
| r-Viniferin                          | 35.8           | 905                                              | 887, 799, 705, 675, 545, 451, 359      |
| tetrameric Stilbenoid                | 38.2           | 905                                              | 887, 811, 799, 705, 545, 451, 359      |

**Table S7.** Extraction contents of resveratrol,  $\epsilon$ -viniferin, r-2-viniferin, and r-viniferin during the optimization process. Data are expressed as the mean  $\pm$  SD [milligrams per gram of dry weight] ( $n = 3$ ); means in the group with different letters (a-c) differ significantly at  $p < 0.05$  as measured by Tukey's HSD Test.

|                                                             |      | Resveratrol                    | $\epsilon$ -Viniferin        | r-2-Viniferin                    | r-Viniferin                     |
|-------------------------------------------------------------|------|--------------------------------|------------------------------|----------------------------------|---------------------------------|
| <b>Water content</b> <sup>1</sup><br>[wt% H <sub>2</sub> O] | 10   | 2.47 $\pm$ 0.11 <sup>a</sup>   | 0.78 $\pm$ 0.08 <sup>a</sup> | 1.10 $\pm$ 0.11 <sup>a</sup>     | 11.61 $\pm$ 1.14 <sup>a</sup>   |
|                                                             | 20   | 2.57 $\pm$ 0.08 <sup>a</sup>   | 0.83 $\pm$ 0.06 <sup>a</sup> | 0.78 $\pm$ 0.08 <sup>b</sup>     | 10.02 $\pm$ 0.66 <sup>a,b</sup> |
|                                                             | 30   | 2.39 $\pm$ 0.10 <sup>a</sup>   | 0.77 $\pm$ 0.09 <sup>a</sup> | 0.68 $\pm$ 0.12 <sup>b</sup>     | 9.22 $\pm$ 1.00 <sup>b</sup>    |
|                                                             | 40   | 1.93 $\pm$ 0.07 <sup>b</sup>   | 0.70 $\pm$ 0.09 <sup>a</sup> | 0.66 $\pm$ 0.08 <sup>b</sup>     | 8.44 $\pm$ 0.58 <sup>b</sup>    |
|                                                             | 50   | 1.89 $\pm$ 0.10 <sup>b</sup>   | 0.69 $\pm$ 0.04 <sup>a</sup> | 0.75 $\pm$ 0.02 <sup>b</sup>     | 8.84 $\pm$ 0.37 <sup>b</sup>    |
| <b>HBA/HBD molar ratio</b> <sup>2</sup><br>[mol/mol]        | 1/1  | 1.95 $\pm$ 0.01 <sup>b,c</sup> | 0.81 $\pm$ 0.07 <sup>a</sup> | 1.06 $\pm$ 0.12 <sup>a</sup>     | 7.50 $\pm$ 0.67 <sup>a</sup>    |
|                                                             | 1/2  | 2.47 $\pm$ 0.11 <sup>a</sup>   | 0.78 $\pm$ 0.08 <sup>a</sup> | 1.10 $\pm$ 0.11 <sup>a</sup>     | 7.25 $\pm$ 0.84 <sup>a</sup>    |
|                                                             | 1/3  | 2.31 $\pm$ 0.08 <sup>a,b</sup> | 0.75 $\pm$ 0.10 <sup>a</sup> | 0.87 $\pm$ 0.24 <sup>a</sup>     | 6.54 $\pm$ 1.50 <sup>a</sup>    |
|                                                             | 1/4  | 1.76 $\pm$ 0.28 <sup>c</sup>   | 0.66 $\pm$ 0.02 <sup>a</sup> | 0.75 $\pm$ 0.10 <sup>a</sup>     | 5.71 $\pm$ 0.56 <sup>a</sup>    |
|                                                             | 1/5  | 1.61 $\pm$ 0.18 <sup>c</sup>   | 0.61 $\pm$ 0.10 <sup>a</sup> | 0.79 $\pm$ 0.19 <sup>a</sup>     | 6.14 $\pm$ 1.16 <sup>a</sup>    |
| <b>Biomass/NADES ratio</b> <sup>3</sup><br>[g/g]            | 1/5  | 1.47 $\pm$ 0.09 <sup>c</sup>   | 0.46 $\pm$ 0.04 <sup>b</sup> | 0.57 $\pm$ 0.06 <sup>c</sup>     | 4.35 $\pm$ 0.53 <sup>b</sup>    |
|                                                             | 1/10 | 2.47 $\pm$ 0.11 <sup>a</sup>   | 0.78 $\pm$ 0.08 <sup>a</sup> | 1.10 $\pm$ 0.11 <sup>a</sup>     | 7.25 $\pm$ 0.84 <sup>a</sup>    |
|                                                             | 1/20 | 2.18 $\pm$ 0.05 <sup>b</sup>   | 0.82 $\pm$ 0.05 <sup>a</sup> | 0.95 $\pm$ 0.06 <sup>a,b</sup>   | 6.98 $\pm$ 0.30 <sup>a</sup>    |
|                                                             | 1/30 | 2.10 $\pm$ 0.03 <sup>b</sup>   | 0.77 $\pm$ 0.08 <sup>a</sup> | 0.84 $\pm$ 0.11 <sup>b</sup>     | 6.36 $\pm$ 0.72 <sup>a</sup>    |
| <b>Extraction time</b> <sup>4</sup><br>[min]                | 2    | 1.80 $\pm$ 0.08 <sup>b</sup>   | 0.78 $\pm$ 0.09 <sup>a</sup> | 0.80 $\pm$ 0.08 <sup>c</sup>     | 6.90 $\pm$ 0.59 <sup>b</sup>    |
|                                                             | 4.5  | 2.47 $\pm$ 0.10 <sup>a</sup>   | 0.78 $\pm$ 0.08 <sup>a</sup> | 1.10 $\pm$ 0.11 <sup>b,c</sup>   | 7.25 $\pm$ 0.84 <sup>b</sup>    |
|                                                             | 7    | 2.36 $\pm$ 0.01 <sup>a</sup>   | 0.92 $\pm$ 0.09 <sup>a</sup> | 1.44 $\pm$ 0.14 <sup>a,b</sup>   | 9.17 $\pm$ 0.88 <sup>a</sup>    |
|                                                             | 10   | 2.47 $\pm$ 0.05 <sup>a</sup>   | 0.95 $\pm$ 0.03 <sup>a</sup> | 1.61 $\pm$ 0.27 <sup>a</sup>     | 9.28 $\pm$ 1.25 <sup>a</sup>    |
|                                                             | 12.5 | 2.49 $\pm$ 0.13 <sup>a</sup>   | 0.79 $\pm$ 0.07 <sup>a</sup> | 1.23 $\pm$ 0.20 <sup>a,b,c</sup> | 6.97 $\pm$ 0.82 <sup>b</sup>    |
|                                                             | 15   | 2.54 $\pm$ 0.05 <sup>a</sup>   | 0.95 $\pm$ 0.09 <sup>a</sup> | 1.43 $\pm$ 0.20 <sup>a,b</sup>   | 6.90 $\pm$ 1.11 <sup>b</sup>    |

<sup>1</sup> fixed Ch/Pdiol, 1/2 mol/mol, 1/10 g/g b/N ratio, 4.5 min

<sup>2</sup> fixed Ch/Pdiol, 10 wt% H<sub>2</sub>O, 1/10 g/g b/N ratio, 4.5 min

<sup>3</sup> fixed Ch/Pdiol, 1/2 mol/mol, 10 wt% H<sub>2</sub>O, 4.5 min

<sup>4</sup> fixed Ch/Pdiol, 1/2 mol/mol, 10 wt% H<sub>2</sub>O, 1/10 g/g b/N ratio

**Table S8.** Extraction contents of resveratrol,  $\epsilon$ -viniferin, r-2-viniferin, and r-viniferin in Ch/Pdiol 1/2, 10 wt% H<sub>2</sub>O NADES after different days of storage. Data are expressed as the mean  $\pm$  SD [milligrams per gram of dry weight] ( $n = 4$ ), means in the group with different letters (a-c) differ significantly at  $p < 0.001$  as measured by Tukey's HSD Test.

| Days | Resveratrol                    | $\epsilon$ -Viniferin          | r-2-Viniferin                  | r-Viniferin                      |
|------|--------------------------------|--------------------------------|--------------------------------|----------------------------------|
| 0    | 0.961 $\pm$ 0.255 <sup>a</sup> | 0.521 $\pm$ 0.081 <sup>a</sup> | 0.471 $\pm$ 0.057 <sup>a</sup> | 5.234 $\pm$ 0.54 <sup>a</sup>    |
| 36   | 1.255 $\pm$ 0.001 <sup>a</sup> | 0.502 $\pm$ 0.002 <sup>a</sup> | 0.441 $\pm$ 0.008 <sup>a</sup> | 4.254 $\pm$ 0.039 <sup>b,c</sup> |
| 69   | 1.244 $\pm$ 0.001 <sup>a</sup> | 0.515 $\pm$ 0.004 <sup>a</sup> | 0.462 $\pm$ 0.006 <sup>a</sup> | 4.543 $\pm$ 0.018 <sup>b</sup>   |
| 93   | 1.284 $\pm$ 0.045 <sup>a</sup> | 0.474 $\pm$ 0.016 <sup>a</sup> | 0.453 $\pm$ 0.015 <sup>a</sup> | 3.795 $\pm$ 0.143 <sup>c</sup>   |
| 128  | 1.241 $\pm$ 0.003 <sup>a</sup> | 0.476 $\pm$ 0.001 <sup>a</sup> | 0.465 $\pm$ 0.002 <sup>a</sup> | 3.864 $\pm$ 0.024 <sup>c</sup>   |



**Table S9.** Extraction contents of resveratrol,  $\epsilon$ -viniferin, r-2-viniferin, and r-viniferin in Fru/LA 1/2, 20 wt% H<sub>2</sub>O NADES after different days of storage. Data are expressed as the mean  $\pm$  SD [milligrams per gram of dry weight] ( $n = 4$ ), means in the group with different letters (a-h) differ significantly at  $p < 0.05$  as measured by Tukey's HSD Test.

| Days | Resveratrol                    | $\epsilon$ -Viniferin          | r-2-Viniferin                  | r-Viniferin                    |
|------|--------------------------------|--------------------------------|--------------------------------|--------------------------------|
| 1    | 0.893 $\pm$ 0.005 <sup>a</sup> | 0.587 $\pm$ 0.004 <sup>a</sup> | 1.441 $\pm$ 0.009 <sup>d</sup> | 4.877 $\pm$ 0.051 <sup>a</sup> |
| 2    | 0.697 $\pm$ 0.012 <sup>b</sup> | 0.529 $\pm$ 0.013 <sup>b</sup> | 1.274 $\pm$ 0.069 <sup>e</sup> | 4.478 $\pm$ 0.065 <sup>b</sup> |
| 3    | 0.658 $\pm$ 0.004 <sup>c</sup> | 0.520 $\pm$ 0.006 <sup>b</sup> | 1.675 $\pm$ 0.060 <sup>c</sup> | 3.889 $\pm$ 0.011 <sup>c</sup> |
| 7    | 0.387 $\pm$ 0.004 <sup>d</sup> | 0.499 $\pm$ 0.012 <sup>c</sup> | 2.242 $\pm$ 0.042 <sup>a</sup> | 3.589 $\pm$ 0.176 <sup>d</sup> |
| 10   | 0.262 $\pm$ 0.008 <sup>e</sup> | 0.376 $\pm$ 0.008 <sup>d</sup> | 2.066 $\pm$ 0.035 <sup>b</sup> | 2.245 $\pm$ 0.103 <sup>e</sup> |
| 17   | 0.108 $\pm$ 0.002 <sup>f</sup> | 0.279 $\pm$ 0.003 <sup>e</sup> | 1.378 $\pm$ 0.025 <sup>d</sup> | 1.784 $\pm$ 0.015 <sup>f</sup> |
| 24   | 0.074 $\pm$ 0.006 <sup>g</sup> | 0.243 $\pm$ 0.005 <sup>f</sup> | 0.927 $\pm$ 0.046 <sup>f</sup> | 1.778 $\pm$ 0.019 <sup>f</sup> |
| 45   | n.d.                           | 0.168 $\pm$ 0.002 <sup>g</sup> | 0.498 $\pm$ 0.004 <sup>g</sup> | n.d                            |
| 59   | n.d.                           | 0.146 $\pm$ 0.002 <sup>h</sup> | 0.313 $\pm$ 0.004 <sup>h</sup> | n.d.                           |

n.d., not detected

**Table S10.** Resveratrol contents in Fru/LA 1/2, 20 wt% H<sub>2</sub>O NADES after different days of storage (start content of resveratrol: 2.08 mg/g NADES). Data are expressed as the mean  $\pm$  SD [milligrams per gram of NADES] ( $n = 4$ ), means in the group with different letters (a-i) differ significantly at  $p < 0.05$  as measured by Tukey's HSD Test.

| Days | Resveratrol                    |
|------|--------------------------------|
| 1    | 1.878 $\pm$ 0.005 <sup>a</sup> |
| 2    | 1.719 $\pm$ 0.012 <sup>b</sup> |
| 3    | 1.673 $\pm$ 0.001 <sup>c</sup> |
| 7    | 1.465 $\pm$ 0.013 <sup>d</sup> |
| 10   | 1.122 $\pm$ 0.044 <sup>e</sup> |
| 17   | 0.965 $\pm$ 0.003 <sup>f</sup> |
| 24   | 0.821 $\pm$ 0.003 <sup>g</sup> |
| 45   | 0.436 $\pm$ 0.006 <sup>h</sup> |
| 59   | 0.281 $\pm$ 0.002 <sup>i</sup> |
